# Supplementary material for: Impacts of Neighborhood Characteristics and Surgical Treatment Disparities on Overall Mortality in Stage I Renal Cell Carcinoma Patients
Source: MDPI journal article supplement (doi:10.3390/ijerph19042050), 2022-02-12
Supplement: s1 [file s1]

# Impacts of Neighborhood Characteristics and Surgical Treatment Disparities on Overall Mortality in Stage I Renal Cell Carcinoma Patients

Alejandro Cruz, Faith Dickerson, Kathryn R. Pulling, Kyle Garcia, Francine C. Gachupin, Chiu-Hsieh Hsu, Juan Chipollini, Benjamin R. Lee, and Ken Batai

**Table S1.** Stage I RCC patient characteristics across Hispanic subgroups.

| Characteristics of Patients, n (%)     | Mexican/ Chicano<br>(n=1,957) | Puerto Rican<br>(n=535) | Cuban<br>(n=432) | South or Central<br>America (n=848) | Dominican<br>(n=166) | <i>p</i> |
|----------------------------------------|-------------------------------|-------------------------|------------------|-------------------------------------|----------------------|----------|
| Age, median (IQR)                      | 58 (49-67)                    | 60 (49-69)              | 64 (54-74)       | 58 (48-67)                          | 62 (53-71)           | <0.001   |
| Gender                                 |                               |                         |                  |                                     |                      | 0.50     |
| Male                                   | 1,135 (58.0)                  | 308 (57.6)              | 269 (62.3)       | 486 (57.3)                          | 98 (59.0)            |          |
| Female                                 | 822 (42.0)                    | 227 (42.4)              | 163 (37.7)       | 362 (42.7)                          | 68 (41.0)            |          |
| Grade, n (%)                           |                               |                         |                  |                                     |                      | 0.26     |
| 1 & 2                                  | 1,171 (77.7)                  | 305 (76.3)              | 244 (81.1)       | 511 (80.0)                          | 73 (73.0)            |          |
| 3 & 4                                  | 336 (22.3)                    | 95 (23.8)               | 57 (18.9)        | 128 (20.0)                          | 27 (27.0)            |          |
| Histologic Subtype                     |                               |                         |                  |                                     |                      | <0.001   |
| Clear Cell                             | 1,208 (84.4)                  | 277 (70.3)              | 208 (69.1)       | 503 (79.0)                          | 53 (49.5)            |          |
| Papillary                              | 104 (7.3)                     | 64 (16.2)               | 53 (17.6)        | 62 (9.7)                            | 32 (29.9)            |          |
| Chromophobe                            | 84 (5.9)                      | 39 (9.9)                | 26 (8.6)         | 53 (8.3)                            | 18 (16.8)            |          |
| Other                                  | 35 (2.4)                      | 14 (3.6)                | 14 (4.7)         | 19 (3.0)                            | 4 (3.7)              |          |
| Insurance Type                         |                               |                         |                  |                                     |                      | <0.001   |
| Private                                | 732 (37.4)                    | 183 (34.2)              | 136 (31.5)       | 349 (41.2)                          | 50 (30.1)            |          |
| Public                                 | 969 (49.5)                    | 332 (62.1)              | 248 (57.4)       | 372 (43.9)                          | 107 (64.5)           |          |
| Not insured                            | 197 (10.1)                    | 14 (2.6)                | 44 (10.2)        | 114 (13.4)                          | 7 (4.2)              |          |
| Unknown                                | 59 (3.0)                      | 6 (1.1)                 | 4 (0.9)          | 13 (1.5)                            | 2 (1.2)              |          |
| Facility Type                          |                               |                         |                  |                                     |                      | <0.001   |
| Community Cancer Program               | 184 (10.4)                    | 36 (7.2)                | 6 (1.4)          | 56 (7.3)                            | 30 (19.2)            |          |
| Comprehensive Community Cancer Program | 736 (41.5)                    | 123 (24.7)              | 85 (20.2)        | 168 (21.8)                          | 30 (19.2)            |          |
| Academic/Research Program              | 780 (44.0)                    | 296 (59.4)              | 114 (27.1)       | 421 (54.7)                          | 84 (53.8)            |          |
| Integrated Network Cancer Program      | 72 (4.1)                      | 43 (8.6)                | 216 (51.3)       | 125 (16.2)                          | 12 (7.7)             |          |
| County-level Residence Pattern         |                               |                         |                  |                                     |                      | <0.001   |
| Metropolitan                           | 1,791 (93.1)                  | 506 (97.3)              | 422 (98.8)       | 824 (99.8)                          | 156 (98.1)           |          |
| Urban                                  | 126 (6.5)                     | 13 (2.5)                | 5 (1.2)          | 2 (0.2)                             | 3 (1.9)              |          |
| Rural                                  | 7 (0.4)                       | 1 (0.2)                 | 0 (0.0)          | 0 (0.0)                             | 0 (0.0)              |          |
| Median Income Quartiles                |                               |                         |                  |                                     |                      | <0.001   |
| <\$38,000                              | 438 (22.4)                    | 164 (31.0)              | 135 (31.4)       | 134 (16.0)                          | 69 (41.6)            |          |
| \$38,000-\$47,999                      | 488 (25.0)                    | 91 (17.2)               | 92 (21.4)        | 158 (18.8)                          | 26 (21.7)            |          |
| \$48,000-\$62,999                      | 597 (30.6)                    | 150 (28.4)              | 120 (27.9)       | 237 (28.2)                          | 36 (21.7)            |          |
| \$63,000+                              | 429 (22.0)                    | 124 (23.4)              | 83 (19.3)        | 311 (37.0)                          | 25 (15.1)            |          |
| % No High School Degree                |                               |                         |                  |                                     |                      | <0.001   |
| ≥21%                                   | 1,050 (53.8)                  | 215 (40.6)              | 224 (52.1)       | 332 (39.5)                          | 104 (62.7)           |          |
| 13.0-20.9%                             | 409 (21.0)                    | 154 (29.1)              | 108 (25.1)       | 199 (23.7)                          | 29 (17.5)            |          |
| 7.0-12.9%                              | 327 (16.8)                    | 111 (21.0)              | 60 (14.0)        | 184 (21.9)                          | 24 (14.5)            |          |
| <7.0%                                  | 166 (8.5)                     | 49 (9.3)                | 38 (8.8)         | 125 (14.9)                          | 9 (5.4)              |          |

**Table S2.** Logistic regression assessing undergoing radical nephrectomy vs. partial nephrectomy stratified by neighborhood characteristics.

| Race/ethnicity          | OR (95% C.I.)    | <i>p</i> | OR (95% C.I.)    | <i>p</i> | <i>p</i> -Interaction |
|-------------------------|------------------|----------|------------------|----------|-----------------------|
| Median Income           | <\$47,999        |          | ≥\$48,000        |          | 0.003                 |
| NHW                     | Reference        |          | Reference        |          |                       |
| AI/AN                   | 1.38 (1.11-1.72) | 0.004    | 1.11 (0.81-1.52) | 0.51     |                       |
| NHB                     | 1.36 (1.29-1.43) | <0.001   | 1.44 (1.35-1.53) | <0.001   |                       |
| Asian American          | 0.99 (0.88-1.22) | 0.91     | 1.17 (1.06-1.29) | 0.003    |                       |
| HA                      | 1.22 (1.15-1.29) | <0.001   | 1.06 (1.01-1.11) | 0.03     |                       |
| % No High School Degree | ≥13.0%           |          | <13.0%           |          | 0.35                  |
| NHW                     | Reference        |          | Reference        |          |                       |
| AI/AN                   | 1.35 (1.07-1.70) | 0.01     | 1.14 (0.85-1.52) | 0.39     |                       |
| NHB                     | 1.38 (1.31-1.45) | <0.001   | 1.39 (1.30-1.48) | <0.001   |                       |
| Asian American          | 1.16 (1.01-1.33) | 0.04     | 1.16 (1.03-1.30) | 0.02     |                       |
| HA                      | 1.18 (1.09-1.21) | <0.001   | 1.09 (1.03-1.15) | 0.003    |                       |

Adjusting for age category, gender, RCC histologic subtype, facility type, insurance type, Charlson/Deyo Score, Year of Diagnosis, urban/rural residence, Great Circle Distance, and neighborhood characteristics (median income or high school education).

**Table S3.** Cox Regression analysis for overall mortality.

|                                       | Unadjusted       |          | Adjusted model 1 |          | Adjusted model 2 |          | Adjusted model 3 |          |
|---------------------------------------|------------------|----------|------------------|----------|------------------|----------|------------------|----------|
|                                       | HR (95%CI)       | <i>p</i> |
| Surgical Treatment                    |                  |          |                  |          |                  |          |                  |          |
| Local Ablation or Nephrectomy         | Reference        |          |                  |          | Reference        |          |                  |          |
| No Treatment                          | 5.76 (5.62-5.91) | <0.001   |                  |          | 3.02 (2.80-3.26) | <0.001   |                  |          |
| Nephrectomy Type                      |                  |          |                  |          |                  |          |                  |          |
| Partial Nephrectomy                   | Reference        |          |                  |          |                  |          | Reference        |          |
| Radical Nephrectomy                   | 1.81 (1.77-1.86) | <0.001   |                  |          |                  |          | 1.52 (1.47-1.58) | <0.001   |
| NHW vs. Racial/ethnic Minority Groups |                  |          |                  |          |                  |          |                  |          |
| NHW                                   | Reference        |          | Reference        |          | Reference        |          | Reference        |          |
| AI/AN                                 | 0.99 (0.84-1.16) | 0.86     | 0.99 (0.79-1.26) | 0.99     | 1.01 (0.80-1.27) | 0.96     | 0.90 (0.69-1.18) | 0.45     |
| NHB                                   | 1.14 (1.10-1.17) | <0.001   | 1.11 (1.06-1.17) | <0.001   | 1.11 (1.05-1.16) | <0.001   | 1.08 (1.02-1.14) | 0.007    |
| Asian American                        | 0.66 (0.59-0.73) | <0.001   | 0.73 (0.63-0.84) | <0.001   | 0.72 (0.63-0.83) | <0.001   | 0.69 (0.59-0.81) | <0.001   |
| HA                                    | 0.83 (0.81-0.86) | <0.001   | 0.87 (0.83-0.91) | <0.001   | 0.87 (0.83-0.92) | <0.001   | 0.85 (0.80-0.90) | <0.001   |
| NHWs vs. HA Subgroups                 |                  |          |                  |          |                  |          |                  |          |
| NHWs                                  | Reference        |          | Reference        |          | Reference        |          | Reference        |          |
| Mexican/Chicano                       | 0.83 (0.73-0.93) | 0.002    | 0.95 (0.80-1.12) | 0.51     | 0.96 (0.81-1.13) | 0.62     | 0.91 (0.75-1.09) | 0.30     |
| Puerto Rican                          | 0.67 (0.52-0.87) | 0.002    | 0.55 (0.37-0.82) | 0.003    | 0.56 (0.37-0.83) | 0.004    | 0.58 (0.37-0.92) | 0.02     |
| Cuban                                 | 0.87 (0.69-1.10) | 0.24     | 0.74 (0.53-1.04) | 0.09     | 0.72 (0.52-1.02) | 0.06     | 0.79 (0.54-1.15) | 0.22     |
| South or Central American             | 0.53 (0.43-0.37) | <0.001   | 0.71 (0.53-0.97) | 0.03     | 0.71 (0.52-0.97) | 0.03     | 0.75 (0.53-1.06) | 0.10     |
| Dominican                             | 0.73 (0.47-1.15) | 0.18     | 0.76 (0.40-1.47) | 0.42     | 0.73 (0.38-1.41) | 0.35     | 0.69 (0.33-1.46) | 0.33     |

Model 1: model includes age category, gender, RCC histologic subtype (NOS not included), grade (1 and 2 vs. 3 and 4), facility type, insurance type, great circle distance, neighborhood characteristics (median income and % high school graduation), Charlson/Deyo Score, and Year of Diagnosis.

Model 2: Model 1 + no surgical treatment vs. treatment; no surgery compared to surgical treatment (HR 3.02, 95% CI: 2.80-3.26)

Model 3: Model 1 + radical vs. partial nephrectomy; Radical compared to partial nephrectomy (HR 1.52, 95% CI: 1.47-1.58)

**Table S4.** Effect of surgical disparities (no treatment vs. local ablation/nephrectomy) on association between race/ethnicity and overall survival.

| Race/ethnicity | No Treatment     |          | Treatment        |          | <i>p</i> <sub>Interaction</sub> |
|----------------|------------------|----------|------------------|----------|---------------------------------|
|                | HR (95%CI)       | <i>p</i> | HR (95%CI)       | <i>p</i> |                                 |
| NHW            | Reference        |          | Reference        |          | 0.24                            |
| NHB            | 1.01 (0.79-1.28) | 0.96     | 1.11 (1.06-1.17) | <0.001   |                                 |
| HA             | 0.88 (0.68-1.15) | 0.37     | 0.87 (0.83-0.91) | <0.001   |                                 |

Regression model includes age category, gender, RCC histologic subtype, grade (1 and 2 vs. 3 and 4), facility type, insurance type, great circle distance, neighborhood characteristics (median income and % high school graduation), Charlson/Deyo Score, and Year of Diagnosis.

**Table S5.** Association between neighborhood socioeconomic factors and surgical patterns in Non-Hispanic Blacks and Non-Hispanic Whites.

|                         | No treatment     |          | Radical vs. Partial |          |
|-------------------------|------------------|----------|---------------------|----------|
|                         | OR (95% CI)      | <i>p</i> | OR (95% CI)         | <i>p</i> |
| Non-Hispanic Blacks     |                  |          |                     |          |
| % No High School Degree |                  |          |                     |          |
| ≥21%                    | Reference        |          | Reference           |          |
| 1.30-20.9%              | 1.10 (0.91-1.34) | 0.32     | 1.12 (1.03-1.22)    | 0.01     |
| 7.0-12.9%               | 1.23 (0.95-1.60) | 0.12     | 0.94 (0.84-1.06)    | 0.35     |
| <7.0%                   | 1.27 (0.87-1.86) | 0.22     | 0.97 (0.83-1.14)    | 0.70     |
| Median Income           |                  |          |                     |          |
| <\$38,000               | Reference        |          | Reference           |          |
| \$38,000-\$47,000       | 0.94 (0.76-1.16) | 0.57     | 0.95 (0.86-1.05)    | 0.29     |
| \$48,000-\$62,000       | 0.81 (0.63-1.03) | 0.08     | 1.03 (0.92-1.15)    | 0.62     |
| \$63,000+               | 0.56 (0.41-0.77) | <0.001   | 0.96 (0.94-1.10)    | 0.60     |
| Non-Hispanic Whites     |                  |          |                     |          |
| % No High School Degree |                  |          |                     |          |
| ≥21%                    | Reference        |          | Reference           |          |
| 1.30-20.9%              | 0.97 (0.85-1.10) | 0.60     | 0.96 (0.91-1.01)    | 0.08     |
| 7.0-12.9%               | 1.03 (0.90-1.18) | 0.66     | 0.91 (0.86-0.96)    | <0.001   |
| <7.0%                   | 0.94 (0.81-1.10) | 0.43     | 0.88 (0.82-0.93)    | <0.001   |
| Median Income           |                  |          |                     |          |
| <\$38,000               | Reference        |          | Reference           |          |
| \$38,000-\$47,000       | 0.92 (0.82-1.04) | 0.20     | 0.96 (0.91-1.01)    | 0.12     |
| \$48,000-\$62,000       | 0.82 (0.72-0.94) | 0.004    | 0.95 (0.90-1.01)    | 0.08     |
| \$63,000+               | 0.80 (0.69-0.93) | 0.003    | 0.89 (0.84-0.95)    | <0.001   |

NHBs – no treatment vs. treatment - age category, sex, facility type, insurance type, year of surgery, RCC histologic subtype, and comorbidity.

NHBs – radical vs. partial – age category, sex, facility type, insurance type, year of surgery, RCC histologic subtype, comorbidity, and urban/rural.

NHWs – no treatment vs. treatment – age category, sex, facility type, insurance type, year of surgery, RCC histologic subtype, comorbidity, and urban/rural.

NHBs – radical vs. partial – age category, sex, facility type, insurance type, year of surgery, RCC histologic subtype, comorbidity, urban/rural, and great distance.

**Table S6.** Association between neighborhood socioeconomic factors and overall mortality in Non-Hispanic Blacks and Non-Hispanic Whites.

|                         | Model 1          |          | Model 2          |          |
|-------------------------|------------------|----------|------------------|----------|
|                         | HR (95% CI)      | <i>p</i> | HR (95% CI)      | <i>p</i> |
| Non-Hispanic Blacks     |                  |          |                  |          |
| % No High School Degree |                  |          |                  |          |
| ≥21%                    | Reference        |          | Reference        |          |
| 1.30-20.9%              | 0.99 (0.90-1.11) | 0.97     | 0.99 (0.88-1.12) | 0.94     |
| 7.0-12.9%               | 1.04 (0.90-1.21) | 0.56     | 0.99 (0.84-1.17) | 0.91     |
| <7.0%                   | 0.93 (0.75-1.15) | 0.49     | 0.93 (0.72-1.19) | 0.57     |
| Median Income           |                  |          |                  |          |
| <\$38,000               | Reference        |          | Reference        |          |
| \$38,000-\$47,000       | 0.93 (0.83-1.04) | 0.18     | 0.87 (0.76-0.99) | 0.03     |
| \$48,000-\$62,000       | 0.78 (0.68-0.89) | <0.001   | 0.76 (0.65-0.89) | <0.001   |
| \$63,000+               | 0.75 (0.63-0.89) | 0.001    | 0.74 (0.61-0.91) | 0.004    |
| Non-Hispanic Whites     |                  |          |                  |          |
| % No High School Degree |                  |          |                  |          |
| ≥21%                    | Reference        |          | Reference        |          |
| 1.30-20.9%              | 0.94 (0.89-0.99) | 0.04     | 0.94 (0.88-1.01) | 0.07     |
| 7.0-12.9%               | 0.90 (0.84-0.95) | <0.001   | 0.90 (0.84-0.97) | 0.003    |
| <7.0%                   | 0.82 (0.76-0.88) | <0.001   | 0.83 (0.76-0.90) | <0.001   |
| Median Income           |                  |          |                  |          |
| <\$38,000               | Reference        |          | Reference        |          |
| \$38,000-\$47,000       | 0.96 (0.91-1.02) | 0.15     | 0.95 (0.89-1.02) | 0.14     |
| \$48,000-\$62,000       | 0.90 (0.85-0.95) | <0.001   | 0.89 (0.83-0.95) | <0.001   |
| \$63,000+               | 0.79 (0.74-0.85) | <0.001   | 0.79 (0.73-0.85) | <0.001   |

NHBs - Age cat, sex, facility type, insurance type, comorbidity, year of diagnosis, RCC histologic subtype, and no treatment vs. treatment (Model 1) or radical/partial nephrectomy (Model 2).

NHWs - Age cat, sex, facility type, insurance type, comorbidity, year of diagnosis, RCC histologic subtype, distance, and no treatment vs. treatment (Model 1) or radical/partial nephrectomy (Model 2).
